# Deciphering function of the pulmonary arterial sphincters in loggerhead sea turtles (*Caretta caretta*)

<sup>1</sup>Daniel García-Párraga, <sup>1</sup>Teresa Lorenzo, <sup>2</sup>Tobias Wang, <sup>3</sup>Jose Luis Ortiz, <sup>4</sup>Joaquín Ortega, <sup>1</sup>Jose Luis Crespo-Picazo, <sup>3</sup>Julio Cortijo, and <sup>1,5</sup>Andreas Fahlman

<sup>1</sup>*Fundación Oceanografic de la Comunidad Valenciana, Gran Vía Marques del Turia 19, 46005 Valencia. Spain*

<sup>2</sup>*Zoophysiology, Department of Biosciences, Aarhus University, 8000 Aarhus C, Denmark*

<sup>3</sup> *Dept of Pharmacology, Faculty of Medicine, University of Valencia, 46010 Valencia, Spain*

<sup>4</sup> *Patología y Sanidad Animal, Departamento PASAPTA, Facultad de Veterinaria, Universidad CEU-Cardenal Herrera, CEU Universities, Moncada (Valencia), Spain*

<sup>5</sup> *Department of Life Science, Texas A&M University-Corpus Christi, 6300 Ocean Drive, Corpus Christi, TX 78412, USA*

\*Corresponding author e-mail: [dgarcia@oceanografic.org](mailto:dgarcia@oceanografic.org)

## ABSTRACT

To provide new insight to the pathophysiological mechanisms underlying gas emboli (GE) in bycaught loggerhead sea turtles (*Caretta caretta*), the present study investigated the vasoactive characteristics of the pulmonary and systemic arteries, and the lung parenchyma (LP). Tissues were opportunistically excised from recently dead animals for *in vitro* studies of vasoactive responses to four different neurotransmitters: acetylcholine (ACh, parasympathetic), serotonin (5HT), epinephrine (Epi, sympathetic) and histamine. The significant amount of smooth muscle in the LP contracted in response to ACh, Epi and histamine. The intrapulmonary and systemic arteries contracted under both parasympathetic and sympathetic stimulation and when exposed to 5HT. However, proximal extrapulmonary arterial (PEPA) sections contracted in response to ACh and 5HT, while Epi caused relaxation. In sea turtles, the relaxation in the pulmonary artery was particularly pronounced at the level of the pulmonary artery sphincter (PASp) where the vessel wall was highly muscular. For comparison, we also studied tissue response in freshwater sliders turtles (*Trachemys scripta elegans*). Both PEPA and LP from freshwater sliders contracted in response to 5HT, ACh and conversely to sea turtles, also under Epi. We propose that in sea turtles the dive response (parasympathetic tone) constricts the PEPA, LP and PASp, causing a pulmonary shunt, limiting gas uptake at depth, which reduces the risk of GE during long and deep dives. Elevated sympathetic tone caused by forced submersion during entanglement with fishing gear increases the pulmonary blood flow causing an increase in N<sub>2</sub> uptake, potentially leading to the formation of blood and tissue GE at the surface. These findings provide potential physiological and anatomical explanations on how these animals have evolved a cardiac shunt pattern that regulates gas exchange during deep and prolonged diving.

## Statement of Significance

The present study proposes a mechanism that allows sea turtles to manage pulmonary perfusion during diving. However this mechanism may become a liability during man-made disturbances causing stress at depth, which may increase inert gas uptake and result in gas emboli (GE).

## INTRODUCTION

Marine vertebrates have developed a variety of mechanisms to avoid the many potential problems of diving, such as atelectasis, transient hyperoxia, extreme hypoxia, ischemia/reperfusion, hyper- and hypotension, acid-base balance disturbances, intravascular gas bubbles, and inert gas narcosis (Butler and Jones, 1997; Lutz and Bentley, 1985; Ponganis, 2015). Most research on diving vertebrates has been devoted to understanding the management of O<sub>2</sub> stores, but some studies have investigated the physiological traits that prevent, or at least alleviate, the pressure-related problems, such as pulmonary barotrauma, N<sub>2</sub> narcosis and “the bends” (Berkson, 1967; Bert, 1870; Fahlman et al., 2017b; García-Párraga et al., 2014; Hooker et al., 2012; Moore et al., 2011; Scholander, 1940).

Decompression sickness (DCS) is a collection of pressure related-symptoms that, by definition, reverse upon recompression treatment (Mahon and Regis, 2014). In scuba divers, continuous breathing of pressurised air results in accumulation of N<sub>2</sub> in the blood and tissues. As the ambient pressure is reduced upon ascent, the high levels of N<sub>2</sub> in the blood and tissues begin to come out of solution leading to supersaturation in the blood. If the ascent is too rapid, the supersaturation may cause bubbles to form in the blood and tissues (Fahlman, 2017). In breath-hold diving vertebrates, N<sub>2</sub> uptake and removal through the lung is more complex as increased ambient pressure causes a pulmonary shunt that correlates with dive depth as the pressure compresses the gas exchange surface (Berkson, 1967; Fahlman et al., 2017b; Kooyman and Sinnett, 1982).

A recent study revealed that by-caught turtles also experience GE after entrapment at depth in fishing gear (García-Párraga et al., 2014). Diagnostic imaging showed widespread GE in the vasculature and tissues (including kidney, heart, liver and spinal cord) upon surfacing. Hyperbaric O<sub>2</sub> treatment alleviated the GE and observable symptoms, and these clinical findings are therefore consistent with those described in human DCS cases. These observations are significant for sea turtle conservation as fishery by-catch is recognized as the greatest threat for most sea turtles worldwide (Lewison et al., 2013; Wallace et al., 2011). Additionally, considering that DCS probably contributes to post-release mortality, undetected cases following release from the fishing gears, may lead to significant underestimates of the numbers of turtles killed by fisheries (Fahlman et al., 2017a; García-Párraga et al., 2014).

While it is important to understand how passive lung compression alters pulmonary shunt (Fahlman et al., 2009), marine vertebrates may have developed additional mechanisms to limit N<sub>2</sub> uptake. In the loggerhead, green (*Chelonia mydas*), hawksbill (*Eretmochelys imbricata*), and leatherback turtle (*Dermochelys coriacea*), a large muscular sphincter has been reported on the pulmonary artery before the insertion into the lung (García-Párraga et al., 2017; Sapsford, 1978; Wyneken, 2001). It has been speculated that this sphincter can reduce pulmonary perfusion during diving (García-Párraga et al., 2014; Sapsford, 1978). To investigate this hypothesis, we determined the vasoactive response *in vitro* (in organ baths) to different neurotransmitters in the autonomic innervation of isolated pulmonary and systemic arteries as well as the global response of lung parenchyma from five loggerhead sea turtles (*Caretta caretta*) that had drowned or were euthanized by the attending veterinarian due to severe injuries after fisheries interactions along the Valencian Coast. For comparison, tissues from the freshwater red-eared sliders (*Trachemys scripta elegans*) were also investigated. Our results indicate that the sphincter on the pulmonary artery contracts strongly by parasympathetic stimulation in sea turtles, and relaxes under sympathetic stimulation. The sympathetic contraction of the pulmonary artery in the red-eared slider differs from other studies showing adrenergic relaxation (Astrid Hougaard and Tobias Wang, unpublished observations; Berger, 1971; Burggren, 1977; Hicks and Comeau, 1994; Milsom et al., 1977). Thus, the dive response may restrict blood flow through the lungs and limit gas exchange, while stress/flight response could relax the sphincter resuming gas exchange. We propose that this mechanism alleviates risk of GE during a normal dive, but may increase risk of GE when diving sea turtles become entangled at depth.

## Material and Methods

### Samples

Tissues were obtained opportunistically (under the Official Permit of Conselleria de Agricultura, Medio Ambiente, Cambio Climático y Desarrollo Rural) from five loggerhead sea turtles (Table 1) that were either recently dead or euthanized due to injuries sustained from fisheries interaction. No animal was euthanized for the purpose of this study. Pathological examination did not reveal any apparent cardiovascular or respiratory disease besides those that could be attributed to fisheries interaction. Lungs

and both pulmonary arteries were excised and placed into a refrigerated container (6-10°C) with tissue culture media (DMEM high Glucose, L0102-500, Thermo Fisher Scientific) for a maximum of 48h. Once at the lab, the arteries of interest were dissected, and connective tissue was removed. Sections from the following tissues were collected:

- 1) lung parenchyma (LP): Sections of lung tissue (5 x 5 x 5 mm) from different portions of the lung that appeared homogeneous and macroscopically normal, were carefully dissected and any pleural connective tissue removed.
- 2) proximal extrapulmonary artery (PEPA),
- 3) pulmonary artery sphincter (PASp, a thick walled muscular section of the pulmonary artery),
- 4) intrapulmonary arteries (IPA, sections of the artery embedded in lung parenchyma),
- 5) systemic arteries (SA, carotids).

For comparison, the vasoactivity of the LP and PEPA (this species does not have an apparent PASp) from six recently euthanized red-eared slider freshwater turtles (*Trachemys scripta*) was tested. These animals were euthanized as part of an eradication program of this invasive species from local natural habitats conducted by Conselleria de Agricultura, Medio Ambiente, Cambio Climático y Desarrollo Rural de la Generalitat Valenciana. These animals were captured from the wild and subsequently euthanized through an intravenous injection of sodium pentobarbital. The curved carapace length of these individuals ranged between 18-26cm. The slider turtles in this study were neither weighed nor sexed before being used in these studies.

All sections of the vessels/sphincters from either species were freed from connective tissue, and cut into 3-4 mm wide rings. The tissues were returned to refrigerated Krebs-Henseleit buffer (K3753, Sigma-Aldrich, St. Louis, Missouri, USA) and the assays were immediately initiated.

## Histology

Sections of PEPA, PASp, and LP from the 5 loggerhead turtles were fixed in 4% paraformaldehyde for 48 h at 20°C and subsequently embedded in paraffin. The embedded tissue was cut into sections (4-6 µm) using a microtome (RM2235, Leica Biosystems, Heidelberg, Germany). The sections were placed on slides with permanent positive charge (Dako Flex IHC Microscope Slide ref: K8020). The paraffin was removed and the tissue was dehydrated in increasing concentrations of alcohol. The tissue was

stained with hematoxylin and eosin (HE) and trichrome and photographed under light microscope (LEICA DM6000).

### **Pharmacodynamics studies: Vasoactive responses**

Each ring, or tissue was mounted on stirrups made out of stainless steel wire and submerged in an organ bath (10 mL, Pan-Lab, USA). One stirrup was fixed at the bottom and the other attached to a force transducer (UF1 Force Sensor; LCM Systems LM), connected to a data acquisition system (PowerLab®, AD Instruments, Castle Hill, New South Wales, Australia), which allowed the force of contraction to be measured. The tissue was mounted with an initial load of 1.2 g, and stabilized in Krebs-Henseleit buffer for 90 min at 22°C, while aerated with a mixture of 5% CO<sub>2</sub> 95% O<sub>2</sub>. Following the stabilization period, the tissue/vessels were washed with new buffer 3 times every 5 min to set the initial vascular tone. To determine the vasoactive response, each tissue/vessel was exposed to one of 3 neurotransmitters in increasing concentrations (10 nM to 100 mM: serotonin (5HT), acetylcholine (ACh), and epinephrine (Epi))(Goldie et al., 1982). In addition, in order to assess the viability of the tissues using a standard neurotransmitter the response to histamine was tested in the LP (Ortiz et al., 1992). The contractile tension was allowed to stabilize until constant response before the next concentration was added.

The vasodilatory dose-response curves were determined by rinsing the ring as detailed above. Next, the vessel ring was contracted by adding 5HT in increasing concentration until a constant contraction was observed (Cortijo et al., 1997). Next, Epi was added in increasing concentration (10 nM to 100 mM), and the setup allowed to stabilize before the force measured was recorded and the next concentration added. Following the highest concentration of Epi, the smooth muscle relaxant papaverine (0.3 mM) was added to obtain the maximum relaxation (Bardou et al., 2002). Vasodilatation was expressed as a percentage of maximum relaxation obtained with papaverine.

### **Data processing and statistical analysis**

Data from pharmacodynamic studies are presented as mean  $\pm$  standard error of the mean (SEM) unless otherwise specified. The total number of experiments (n) was averaged for each animal and the number of individual included for each tissue reported.

Vessel contractions are reported in grams (g), while relaxations are reported as a percentage change in tension as compared with the absolute change in tension during exposure to papaverine, i.e.  $[(\text{measured tension} - \text{papaverine tension}) / (\text{maximum tension} - \text{papaverine tension}) \times 100] - 100$ .

We used common dose-response equations to fit the absolute increase (g, contraction) or relative decrease (% relaxation) in force against  $\log_{10}$ -transformed neurotransmitter concentration ( $\log M$ ). For contraction we used the following equation:

$$\text{Force (g)} = E_{\min} + (E_{\max} - E_{\min}) \times (1 + 10^{(\log_{10}(\text{EC}_{50}) - C)})^{-1} \quad \text{Eq. 1}$$

Where the generated force is estimated by the minimum ( $E_{\min}$ ) and maximum ( $E_{\max}$ ) plateaus in the sigmoidal response,  $C$  the  $\log_{10}$ -transformed molar concentration of neurotransmitter and  $\log_{10}(\text{EC}_{50})$  the logarithm of the  $\text{EC}_{50}$  (the neurotransmitter molar concentration at half the maximal response, i.e. half of the difference between  $E_{\min}$  and  $E_{\max}$ ). For relaxation, the dependent variable was normalized and expressed as a percentage of the minimum force following exposure to papaverine (see above).

The parameters were estimated using R version 3.2.1 (R Development Core Team, 2015) including the nlme package version 3.1-124 (Pinheiro et al., 2015) and the MuMIn package version 1.15.6 (Pinheiro et al., 2015). Vessel and tissue responses from individual animals were treated as a random effect, which accounted for the correlation between repeated measurements on the same individual (Littell et al., 1998). We used a t-test to compare differences in estimated parameter values for different tissues. A P-value  $< 0.05$  was considered significant and a  $P < 0.1$  is reported as a trend.

## RESULTS

### Macroscopic and histological findings

The gross and histological findings observed in the PEPA were very similar in loggerheads and freshwater sliders. Histologically, these arteries show the typical morphology previously described for elastic arteries in other species, i.e., large lumen and thin wall with numerous elastic fibers and few smooth muscle cells in the tunica media (Figs. 1, 2A and B). Grossly, the unique PAsp previously described in the mid region of the extrapulmonary artery of loggerhead turtles was identified (Sapsford,

1978; Wyneken, 2001). The PASp occupied approximately the middle third of the total length of the extrapulmonary artery (Fig. 1). This region is characterized by a narrower lumen and thicker wall with accordion-like circumferential ridges on the luminal surface. These findings were especially evident once the whole vessel had been fixed in 4% paraformaldehyde for 48h. Histologically, the morphology of the PASp is very different from than the rest of the PEPA. Most of the elastic fibers are replaced by thick bundles of smooth muscle arranged in circumferential folds, which extend from the tunica media to the intima. This allows the lumen to close when the muscle contracts (Figs. 2C and D). In the freshwater turtle, no gross or histological evidence of the PASp was observed. In the lung, thick bundles of smooth muscle fibers were noticeable in the submucosa of the respiratory ducts connecting the main bronchus with the faveoli in both loggerheads and freshwater sliders (Figs. 2E and F). In summary, these histological findings show that the PEPA in the slider is similar to the proximal portion of the pulmonary artery of the loggerhead sea turtle, and both species present large amount of smooth muscle in the lung. However, the strong development of the muscular component under the intimal layer at the region of the sphincter is highly specific of the sea turtle.

### **Dose response studies**

In the loggerhead turtle, 5HT and ACh caused contraction in all tissues studied, but the most forceful contraction was seen at the level of the PASp (Fig. 3A and B, Fig. 4, Table 2). Epi caused contraction of the SA, IPA and LP (Fig. 3C), and relaxation of the PEPA and the PASp (Fig. 3D, Table 2).

The vasoactive responses in PEPA and PASp were always in a similar direction (contraction or relaxation) for any neurotransmitter, but the contraction ( $E_{max}$ ) was stronger for both 5HT and ACh at the level of the PASp where the muscular layer of the artery is thicker.

Histamine caused similar contraction as 5HT and Epi at the level of LP but much weaker than ACh, which clearly caused the stronger contractile response of the pulmonary tissue (Table 2).

In the freshwater turtle, ACh, 5HT and Epi caused similar vasoconstriction in PEPA and although all 3 neurotransmitters induced the contraction of the LP (3. 1A-C, Table 1), ACh clearly provoked the strongest response.



## DISCUSSION

The divergent responses in freshwater and sea turtles in the current study indicate that sea turtles have evolved a distinct mechanism to avoid pressure related problems. By managing the temporal ventilation-perfusion ratio in the lung, they may avoid DCS, while retaining the ability to manage pulmonary O<sub>2</sub> stores and CO<sub>2</sub> levels during dives (Fahlman et al., 2018; García-Párraga et al., 2018). Failure of this mechanism, caused by fisheries interaction, may explain the high incidence of GE during enforced submersion of turtles (Fahlman et al., 2017a; García-Párraga et al., 2014).

We show that the PEPA, IPA, and PASp contract when exposed to 5HT and ACh, which is qualitatively similar to the pulmonary artery in humans and other mammals (Cortijo et al., 1997; Furchgott and Bhadrakom, 1953; Van Nueten et al., 1985), and in line with previous studies with turtles and other reptiles (Berger, 1971; Burggren, 1977; Milsom et al., 1977; Taylor et al., 2009; Wang, 2011). The contraction of the PASp was more intense than in other regions of the pulmonary artery or compared to the red-eared slider also studied (Table 2, Table 3). We propose that this is due to the large amount of muscular bundles in the thicker wall of the PASp (Figures 2a-d). We speculate this high level of contraction at this particularly thick portion of the pulmonary artery is likely to cause complete closure of the lumen in the living sea turtle. Exposure to Epi caused vasoconstriction of all tissues from the freshwater red-eared slider (Fig. 3D). In the sea turtle, IPA, SA and LP constricted when exposed to Epi, but both portions of the extrapulmonary artery dilated (PEPA and PASp, Fig. 3D). During the initial stages of this work, we exposed the LP to histamine and 5HT, which are standard neurotransmitters used to evaluate vascular response in human tissues and other animal models including reptiles (Kiniwa and Tasaka, 1989; Parsons and Ganellin, 2006; Reite, 1970; Skovgaard et al., 2018). This allowed us to assess the response in comparison with other species previously studied and ensure that the tissues were still viable.

The dive response is a conserved reflex observed in all vertebrates and is a set of cardiovascular changes caused by increased parasympathetic tone causing bradycardia, and peripheral vasoconstriction resulting in reduced cardiac output (Berkson, 1966; Bert, 1870; Lutz and Bentley, 1985). It is believed that these cardiovascular responses are used to conserve available O<sub>2</sub> for vital organs, such as the heart and the brain, and

that reduced blood flow and a reduction in the function of certain organs, e.g. kidney, help to reduce the overall rate of O<sub>2</sub> consumption (Lutz and Bentley, 1985; Scholander, 1940). Voluntary aerobic dives in loggerhead sea turtles are known to range from about 7 min for smaller animals (2-15 kg), up to 27 min for larger individuals (20 kg) (Lutz and Bentley, 1985).. These species dive exclusively on inhalation, and it has been suggested that the lung is a major source of available O<sub>2</sub> (Lutz and Bentley, 1985). However, access to O<sub>2</sub> requires that the faveoli remain open to allow gas exchange whenever the lung is perfused. As the pressure increases with depth the faveoli compress, causing a passive pulmonary shunt that reduces gas exchange (Berkson, 1967), similar to alveolar collapse in marine mammals. Consequently, to use the pulmonary O<sub>2</sub> stores, dives should be shallower than the depth where the faveoli collapse and gas exchange ceases. However, a recent hypothesis suggests that management of the ventilation-perfusion ratio provide a mechanism to selectively exchange gases of different solubility (Fahlman et al., 2018; García-Párraga et al., 2018).

In a previous study, a pulmonary shunt was shown in turtles diving in a hyperbaric chamber that increased with depth, and the author estimated that faveolar collapse occurred at depths > 80 m (Berkson, 1967). In loggerhead turtles, 90% of their time is spent either at the surface or at depths shallower than 40 m (Polovina et al., 2004). Thus, the majority of dives in loggerhead sea turtles are shallower than the depth where passive compression faveoli collapse prevents gas exchange. Consequently, N<sub>2</sub> would continuously be taken up in this species, increasing the risk for GE even during natural dives. However, in turtles central vascular shunting is possible (Hicks et al., 1996), which would cause an air/blood mismatch that would serve to alter gas uptake or removal even in the inflated lung (Farhi, 1967; Farhi and Yokoyama, 1967; West, 1962). While pulmonary blood flow can be significantly reduced, and even abolished in freshwater turtles or rattlesnakes during diving and vagal stimulation (Milsom et al., 1977; Taylor et al., 2009; Wang, 2011; Wang et al., 2001), the well developed sphincter appears unique for sea turtles and allows for complete pulmonary bypass solely by regulation of the tone on the extrinsic portion of the pulmonary artery. The PASp in particular, and also the LP, contracts under parasympathetic tone. Complete closure of the muscular PASp would avoid pulmonary perfusion, inducing a right to left (R->L) intracardiac shunt, redirecting all cardiac output to the systemic circulation. Contraction of the LP would be facilitated by the large number of smooth muscular bundles

interspersed throughout the parenchyma (Fig 2E). The contraction would help to manage the ventilation/perfusion mismatch to minimize uptake of gases with low solubility (N<sub>2</sub>), while permitting exchange of gases with higher solubility (O<sub>2</sub> and CO<sub>2</sub>) (Farhi and Yokoyama, 1967; West, 1962). A similar mechanism has recently been suggested for marine mammals (Fahlman et al., 2018; García-Párraga et al., 2018).

The undivided chelonian heart provides for intracardiac shunts, and it is well-established that pulmonary blood flow is reduced during diving causing R-L shunts, while pulmonary flow increases during intermittent ventilation where a L-R shunt may dominate (Burggren, 1977; Shelton and Burggren, 1976; Wang et al., 1997; Wang et al., 2001). The changes in pulmonary blood flow are mediated by the parasympathetic innervation where increased tone elevates pulmonary vascular resistance through vagal innervation of the smooth muscle within the wall of the pulmonary artery (Burggren, 1977; Hicks, 1998; Shelton and Burggren, 1976; Wang et al., 1997; Wang et al., 2001). Our observation that the pulmonary vessels from sea turtles exhibit intense vasoconstriction when exposed to 5HT and ACh suggest that the PASp is an important anatomical vasomotor structure driving the cardiac shunt in sea turtles. The vasoconstriction would significantly reduce, or possibly prevent, pulmonary blood flow. In the sea turtle, autonomic regulation of pulmonary blood flow seems to have evolved extensively and led to the development of the PASp in comparison with the pond turtles that normally perform rather shallow dives. In deeper diving species, such as the leatherback sea turtle, the PASp have a much thicker muscular wall and with longitudinal folds as compared with the shallower diving loggerhead sea turtle (García-Párraga et al., 2017; Wyneken, 2001). The PASp is virtually absent in the freshwater turtle, and we hypothesize that this anatomical feature provides a crucial physiological adaptation for deep and long breath-hold dives in sea turtles. However, complete pulmonary bypass is still possible despite less innervation and smooth muscle in pulmonary vessels in freshwater turtles (Burggren and Shelton, 1979; White et al., 1989).

While the pulmonary circulation is under strong parasympathetic modulation, Epi released during sympathetic stimulation opens the sphincter in the sea turtles, causing gas exchange to resume. In fact, the relaxation of the PEPA in response to Epi occurred *in vitro* even in the presence of ACh in the tissue bath. This could be a physiological mechanism to occasionally access pulmonary O<sub>2</sub> stores and/or eliminate

excess of CO<sub>2</sub> during prolonged dives or during increased demands (García-Párraga et al., 2018; Malte et al., 2016a; Malte et al., 2016b; Wang et al., 1997; Wang and Hicks, 1996a; Wang et al., 2001). Tightly regulated matching of ventilation and perfusion could allow short periods of controlled lung perfusion to preferentially exchange O<sub>2</sub> and CO<sub>2</sub> with minimal N<sub>2</sub> exchange (Fahlman et al., 2018; Farhi, 1967; Farhi and Yokoyama, 1967; West, 1962). However, if perfusion of the lung is maintained during certain times at depths shallower than the faveolar collapse depth, the decreasing ventilation-perfusion ratio would increase N<sub>2</sub> uptake, which in turn would increase the risk of gas emboli after surfacing. Once venous bubbles form, a R-L shunt would pass bubbles directly to the systemic circulation without the ability for the lung to act as a filter (Bove, 1998; Cross and Jennings, 1994), increasing risk for GE's to enter the systemic circulation (Fahlman et al., 2017a; García-Párraga et al., 2014; Vann et al., 2011).

In fact, different studies correlate exercise with breathing frequency, pulmonary blood flow, and heart rate in green turtles (Butler et al., 1984; Southwood Williard, 2013; West et al., 1992). An increase in heart rate, catecholamine release, and lung perfusion has been observed in a number of reptiles following exercise/capture, also supporting our observations (Shelton and Burggren, 1976; Wang and Hicks, 1996b; Wang et al., 2001; West et al., 1992; White and Ross, 1966).

We propose that when a turtle is caught in a net, the confinement stress and the increased muscular activity as the turtle attempts to escape elevates the sympathetic tone and may elevate circulating catecholamines (Comeau and Hicks, 1994; Hicks and Comeau, 1994; Overgaard et al., 2002; Shelton and Burggren, 1976). However, it is important to note that we do not know the physiological concentrations of epinephrine and norepinephrine in stressed or entangled sea turtles, which would be an important variable to assess. In stressed freshwater turtles, the peak epinephrine concentration is around 10<sup>-8</sup> M (REF), resulting in approximately 20% and 5% relaxation of PEPA and PASp, respectively, which may be sufficient to increase pulmonary flow and gas exchange to elevate risk for GE. In addition, the vasoactive effects of norepinephrine should be also considered in future studies, as its vascular concentration can be significantly higher than those of epinephrine in stressed freshwater turtles (Wasser and Jackson, 1991). Prolonged sympathetic tone and circulating catecholamines would reverse the diving bradycardia, increase cardiac output and reduce the R-L shunt at depth. These responses would elevate transfer of N<sub>2</sub> from the lungs and increase absorption in the tissues. Thus, with prolonged entrapment in the fishing nets at depth, enough N<sub>2</sub> may be stored in the tissues for GE to be formed

during rapid ascent to the surface (Fahlman, 2017; Fahlman et al., 2017a; García-Párraga et al., 2014).

Failure of the physiological mechanism that normally regulates ventilation and blood flow through the lungs, conserves O<sub>2</sub>, and minimizes N<sub>2</sub> uptake can result in GE during ascent. Increased activity, resulting in lactic acid buildup has been shown in bycaught turtles even during short submersion episodes (Stabenau et al., 1991; Stabenau and Vietti, 2003). We propose that entanglement and bycatch may result in increased activity, heart rate, sympathetic tone, and lung perfusion, which result in failure of the ventilation-perfusion mismatch that regulates gas exchange during diving in sea turtles (Comeau and Hicks, 1994; Hicks and Comeau, 1994; Hopkins et al., 1996; Overgaard et al., 2002; Shelton and Burggren, 1976). Pulmonary sphincters have been identified in several sea turtle species (García-Párraga et al., 2017; Sapsford, 1978; Wyneken, 2001). This anatomical feature may be a conserved trait related to deep diving that provide a strategy to reduce diving related problems while at the same time provide selective access when needed to the pulmonary O<sub>2</sub> store.

Numerous studies reveal significant physiological disturbances of sea turtles entangled in fishing gear (Harms et al., 2003; Lutz and Dunbar-Cooper, 1987; Snoddy et al., 2009; Snoddy and Southwood Williard, 2010; Stabenau and Vietti, 2003; Wyneken et al., 2013). Only recently have there been reports indicating that fisheries interaction may result in GE. In previous work, we described the presence of GE following fisheries interaction (García-Párraga et al., 2014), and the prevalence and potential risk factors in the fisheries along the Valencian Coast (Fahlman et al., 2017a). The present work provides a potential mechanism how the normal physiological function of the PEPA and PASp respond during entrapment in fishing gear, which can lead to disruption and failure of normal physiological regulation, increase pulmonary blood flow and cause GE to form. To test our hypothesis, we would need to measure the circulating concentration of epinephrine or the pulmonary blood flow in entangled sea turtles. In fact there are a number of potential risk factors that may vary the severity of this trauma. For example, fishing depth, the duration that the fishing gear is deployed, water temperature, and ascent rate may be a few (Fahlman et al., 2017a). Future work is aimed at further defining these risk variables and their importance in order to establish effective mitigation measures for fisheries.

## Acknowledgments

We are grateful for the fishermen that collaborated in this study, for all the aquarists and volunteers that helped bring and care for the animals at the rehabilitation facility at Oceanogràfic (ARCA del Mar). We are grateful for all the help from the Valencian Government, especially to the Servicio de Vida Silvestre de la Conselleria d'Agricultura, Medi Ambient, Canvi Climàtic i Desenvolupament Rural de la Generalitat Valenciana. Also we thank the Universitat de Valencia for their participation in the regional sea turtle stranding network.

## Competing interests

None of the authors have competing interests.

## Author contributions

D.G-P conceived of the study, designed the experiments, and helped with the paper, T.L. performed the tissue bath experiments, the immunohistochemistry, western blots, and helped with the paper, T.W. provided valuable input on the results and helped with the paper, J-L.O, helped supervise the tissue bath experiments, and the analysis of the results, J.O. performed the histological studies, J-L.C-P helped with the animals and the samples, J.C. helped design the experiments, A.F. provided funding, helped design the experiments, drafted the paper, and performed the data analysis

## Funding

Funding for this project was provided by the Office of Naval Research to AF (ONR YIP Award #N000141410563).

## Literature cited

- Bardou, M., F. Goirand, A. Bernard, P. Guerard, M. Gatinet, P. Devillier, J.-P. Dumas, E.J. Morcillo, L. Rochette, and M. Dumas. 2002. Relaxant Effects of Selective Phosphodiesterase Inhibitors on U46619 Precontracted Human Intralobar Pulmonary Arteries and Role of Potassium Channels. *Journal of Cardiovascular Pharmacology* 40:153-161.
- Berger, P.J. 1971. The vagal and sympathetic innervation of the heart of the lizard *Tiliqua rugosa*. *The Australian journal of experimental biology and medical science* 49(3):297-304 49:297-304.



- Berkson, H. 1966. Physiological adjustments to prolonged diving in the Pacific Greent turtle (*Chelonia mydas agassizii*). *Comparative Biochemistry and Physiology* 18:101-119.
- Berkson, H. 1967. Physiological adjustments to deep diving in the pacific green turtle (*Chelonia mydas agassizii*). *Comparative Biochemistry and Physiology* 21:507-524.
- Bert, P. 1870. Lecons sur la physiologie comparee de la respiration.
- Bove, A.A. 1998. Risk of decompression sickness with patent foramen ovale. *Undersea and Hyperbaric Medicine* 25:175-178.
- Burggren, W. 1977. The pulmonary circulation of the chelonian reptile: morphology, haemodynamics and pharmacology. *Journal of Comparative Physiology* 116:303-323.
- Burggren, W.W., and G. Shelton. 1979. Gas Exchange and Transport During Intermittent Breathing in Chelonian Reptiles. *The Journal of Experimental Biology* 82:75-92.
- Butler, P.J., and D.R. Jones. 1997. Physiology of Diving Birds and Mammals. *Physiol. Rev.* 77:837-899.
- Butler, P.J., W.K. Milsom, and A.J. Woakes. 1984. Respiratory, cardiovascular and metabolic adjustments during steady state swimming in the green turtle, *Chelonia mydas*. *Journal of Comparative Physiology B* 154:167-174.
- Comeau, S.G., and J.W. Hicks. 1994. Regulation of central vascular blood flow in the turtle. *American Journal of Physiology-Regulatory, Integrative and Comparative Physiology* 276:R569-R578.
- Cortijo, J., M. Martí-Cabrera, E. Bernabeu, T. Domenech, J.G. Bou, A.G. Fernández, J. Beleta, J.M. Palacios, and E.J. Morcillo. 1997. Characterization of 5-HT receptors on human pulmonary artery and vein: functional and binding studies. *British Journal of Pharmacology* 122:1455-1463.
- Cross, S., and K. Jennings. 1994. Decompression sickness; Role of patent foramen ovale is limited. *British Medical Journal* 309:743-744.
- Fahlman, A. 2017. Allometric scaling of decompression sickness risk in terrestrial mammals; cardiac output explains risk of decompression sickness. *Scientific Reports* 7:1-9.
- Fahlman, A., J.-L. Crespo Picazo, B. Sterba-Boatwright, B.A. Stacy, and D. Garcia-Parraga. 2017a. Defining risk variables causing gas embolism in loggerhead sea turtles (*Caretta caretta*) caught in trawls and gillnets. *Scientific Reports* 7:2739.
- Fahlman, A., S.K. Hooker, A. Olszowka, B.L. Bostrom, and D.R. Jones. 2009. Estimating the effect of lung collapse and pulmonary shunt on gas exchange during breath-hold diving: the Scholander and Kooyman legacy *Respiratory Physiology & Neurobiology* 165:28-39.
- Fahlman, A., F. Jensen, P.L. Tyack, and R. Wells. 2018. Modeling tissue and blood gas kinetics in coastal and offshore common Bottlenose dolphins, *Tursiops truncatus*. *Frontiers Physiology* 9:1-13.
- Fahlman, A., M.J. Moore, and D. Garcia-Parraga. 2017b. Respiratory function and mechanics in pinnipeds and cetaceans. *Journal of Experimental Biology* 220:1761-1763.
- Farhi, L.E. 1967. Elimination of inert gas by the lung. *Respiration physiology* 3:1-11.
- Farhi, L.E., and T. Yokoyama. 1967. Effects of ventilation-perfusion inequality on elimination of inert gases. *Respiration physiology* 3:12-20.
- Furchgott, R.F., and S. Bhadrakom. 1953. Reactions of strips of rabbit aorta to epinephrine, isopropylarterenol, sodium nitrite and other drugs *Journal of Pharmacology and Experimental Therapeutics* 108:129-143.
- García-Párraga, D., J.L. Crespo-Picazo, Y. Bernaldo de Quirós, V. Cervera, L. Martí-Bonmati, J. Díaz-Delgado, M. Arbelo, M.J. Moore, P.D. Jepson, and A. Fernández. 2014. Decompression Sickness ("the bends") in Sea Turtles. *Diseases of Aquatic Organisms* 111:191-205.

- García-Párraga, D., M. Moore, and A. Fahlman. 2018. Pulmonary ventilation– perfusion mismatch: a novel hypothesis for how diving vertebrates may avoid the bends. *Proceedings Royal Society B* 285:20180482.
- García-Párraga, D., A.L.S. Valente, B.A. Stacy, and J. Wyneken. 2017. Cardiovascular System. In *Sea Turtle Health and Rehabilitation*. C.A. Manire, T.M. Norton, B.A. Stacy, C.A. Harms, and C.J. Innis, editors. 295-320.
- Goldie, R.G., J.W. Paterson, and J.L. Wale. 1982. Pharmacological responses of human and porcine lung parenchyma, bronchus and pulmonary artery. *British Journal of Pharmacology* 76:515-521.
- Harms, C.A., K.M. Mallo, P.M. Ross, and A. Segars. 2003. Venous blood gases and lactates of wild loggerhead sea turtles (*Caretta caretta*) following two capture techniques. *Journal of Wildlife Diseases* 39:366-374.
- Hicks, J., and S. Comeau. 1994. Vagal regulation of intracardiac shunting in the turtle *Pseudemys scripta*. *Journal of Experimental Biology* 186:109-126.
- Hicks, J.W. 1998. Cardiac Shunting in Reptiles: Mechanisms, Regulation and Physiological Function. In *Biology of the Reptilia*. C. Gans, and A.S. Gaunt, editors. Society for the Study of Amphibians and Reptiles, Ithaca, NY. 425-483.
- Hicks, J.W., A. Ishimatsui, S. Molloy, A. Erskin, and N. Heisler. 1996. The mechanism of cardiac shunting in reptiles: A new synthesis. *Journal of Experimental Biology* 199:1435-1446.
- Hooker, S.K., A. Fahlman, M.J. Moore, N. Aguilar de Soto, Y. Bernaldo de Quiros, A.O. Brubakk, D.P. Costa, A.M. Costidis, S. Dennison, K.J. Falke, A. Fernandez, M. Ferrigno, J.R. Fitz-Clarke, M.M. Garner, D.S. Houser, P.D. Jepson, D.R. Ketten, P.H. Kvadsheim, P.T. Madsen, N.W. Pollock, D.S. Rotstein, T.K. Rowles, S.E. Simmons, W. Van Bonn, P.K. Weathersby, M.J. Weise, T.M. Williams, and P.L. Tyack. 2012. Deadly diving? Physiological and behavioural management of decompression stress in diving mammals. *Proc. Roy. Soc. B* 279:1041-1050.
- Hopkins, S.R., T. Wang, and J.W. Hicks. 1996. The effect of altering pulmonary blood flow on pulmonary gas exchange in the turtle *Trachemys (Pseudemys) scripta*. *The Journal of Experimental Biology* 199:2207-2214.
- Kiniwa, M., and K. Tasaka. 1989. Histamine and its actions on isolated tissues of lower vertebrates. *Methods and findings in experimental and clinical pharmacology* 11:87-95.
- Kooyman, G.L., and E.E. Sinnett. 1982. Pulmonary shunts in Harbor seals and sea lions during simulated dives to depth. *Physiological Zoology* 55:105-111.
- Lewison, R.L., B.P. Wallace, J. Alfaro-Shigueto, J.C. Mangel, S.M. Maxwell, and E.L. Hazen. 2013. Fisheries bycatch of marine turtles. In *The biology of sea turtles*. J. Wyneken, K.J. Lohmann, and J.A. Musick, editors. CRC Press, Boca Raton, FL.
- Littell, R.C., P.R. Henry, and C.B. Ammerman. 1998. Statistical analysis of repeated measures data using SAS procedures. *Journal of Animal Science* 76:1216-1231.
- Lutz, P.L., and B.B. Bentley. 1985. Physiology of Diving in the Sea Turtle. *Copeia* 1985:671-679.
- Lutz, P.L., and A. Dunbar-Cooper. 1987. Variations in the blood-chemistry of the loggerhead sea-turtle, *Caretta caretta*. *Fishery Bulletin* 85:37-43.
- Mahon, R.T., and D.P. Regis. 2014. Decompression and decompression sickness. *Comprehensive Physiology* 4:1157-1175.
- Malte, C.L., H. Malte, and T. Wang. 2016a. The long road to steady state in gas exchange: metabolic and ventilatory responses to hypercapnia and hypoxia in Cuvier's dwarf caiman. *The Journal of Experimental Biology* 219:3810-3821.



- Malte, C.L., H. Malte, and T. Wang. 2016b. Periodic ventilation: Consequences for the bodily CO<sub>2</sub> stores and gas exchange efficiency. *Respiratory Physiology & Neurobiology* 231:63-74.
- Milsom, W.K., B.L. Langille, and D.R. Jones. 1977. Vagal control of pulmonary vascular resistance in the turtle *Chrysemys scripta*. *Canadian Journal of Zoology* 55:359-367.
- Moore, M.J., T. Hammar, J. Arruda, S. Cramer, S. Dennison, E. Montie, and A. Fahlman. 2011. Hyperbaric computed tomographic measurement of lung compression in seals and dolphins. *Journal of Experimental Biology* 214:2390-2397.
- Ortiz, J.L., C. Labat, X. Norel, I. Gorenne, J. Verley, and C. Brink. 1992. Histamine Receptors on Human Isolated Pulmonary Arterial Muscle Preparations: Effects of Endothelial Cell Removal and Nitric Oxide Inhibitors. *The Journal of Pharmacology and Experimental Therapeutics* 260:762-767.
- Overgaard, J., J.A. Stecyk, A.P. Farrell, and T. Wang. 2002. Adrenergic control of the cardiovascular system in the turtle *Trachemys scripta*. *Journal of Experimental Biology* 205:3335-3345.
- Parsons, M.E., and C.R. Ganellin. 2006. Histamine and its receptors. *British journal of pharmacology* 147:S127-S135.
- Pinheiro, J., D. Bates, S. DebRoy, and D. Sarkar. 2015. {nlme} Linear and Nonlinear Mixed Effects Models. In R Core Team.
- Polovina, J.J., G.H. Balazs, E.A. Howell, D.M. Parker, M.P. Seki, and P.H. Dutton. 2004. Forage and migration habitat of loggerhead (*Caretta caretta*) and olive ridley (*Lepidochelys olivacea*) sea turtles in the central North Pacific Ocean. *Fisheries Oceanography* 13:36-51.
- Ponganis, P.J. 2015. Diving Physiology of Marine Mammals and Seabirds. Cambridge University Press, Cornwall, UK.
- R Development Core Team. 2015. R: A language and environment for statistical computing. In Vienna, Austria.
- Reite, O.B. 1970. The Evolution of Vascular Smooth Muscle Responses to Histamine and 5 - Hydroxytryptamine: III. Manifestation of dual actions of either amine in reptiles 2. *Acta physiologica scandinavica* 78:213-231.
- Sapsford, C.W. 1978. Anatomical Evidence for Intracardiac Blood Shunting in Marine Turtles. *Zoologica Africana* 13:57-62.
- Scholander, P.F. 1940. Experimental investigations on the respiratory function in diving mammals and birds. *Hvalrådets Skrifter* 22:1-131.
- Shelton, G., and W. Burggren. 1976. Cardiovascular dynamics of the chelonia during apnoea and lung ventilation. *Journal of Experimental Biology* 64:323-343.
- Skovgaard, N., A.S. Abe, E.W. Taylor, and T. Wang. 2018. Cardiovascular effects of histamine in three widely diverse species of reptiles. *Journal of Comparative Physiology B* 188:153-162.
- Snoddy, J.E., M. Landon, G. Blanvillain, xeb, lle, and A. Southwood. 2009. Blood Biochemistry of Sea Turtles Captured in Gillnets in the Lower Cape Fear River, North Carolina, USA. *The Journal of Wildlife Management* 73:1394-1401.
- Snoddy, J.E., and A. Southwood Williard. 2010. Movements and post-release mortality of juvenile sea turtles released from gillnets in the lower Cape Fear River, North Carolina, USA. *Endangered Species Research* 12:235-247.
- Southwood Williard, A. 2013. Physiology as Integrated Systems. In The Biology of Sea Turtles, Volume III. J. Wyneken, K.J. Lohmann, and J.A. Musick, editors. CRC Press, 1-30.

- Stabenau, E.K., T.A. Heming, and J.F. Mitchell. 1991. Respiratory, acid-base and ionic status of Kemps Ridley sea-turtles (*Lepidochelys kempfi*) subjected to trawling. *Comparative Biochemistry and Physiology A* 99:107-111.
- Stabenau, E.K., and K.R.N. Vietti. 2003. The physiological effects of multiple forced submergences in loggerhead sea turtles (*Caretta caretta*). *Fishery Bulletin* 101:889-899.
- Taylor, E.W., D.V. Andrade, A.S. Abe, C.A.C. Leite, and T. Wang. 2009. The unequal influences of the left and right vagi on the control of the heart and pulmonary artery in the rattlesnake, *Crotalus durissus*. *Journal of Experimental Biology* 212:145-151.
- Van Nueten, J.M., W.J. Janssens, and P.M. Vanhoutte. 1985. Serotonin and vascular reactivity. *Pharmacological Research Communications* 17:585-608.
- Vann, R.D., F.K. Butler, S.J. Mitchell, and R.E. Moon. 2011. Decompression illness. *Lancet* 377:153-164.
- Wallace, B.P., A.D. DiMatteo, A.B. Bolten, M.Y. Chaloupka, B.J. Hutchinson, F.A. Abreu-Grobois, J.A. Mortimer, J.A. Seminoff, D. Amorcho, K.A. Bjorndal, J. Bourjea, B.W. Bowen, R. Briseño Dueñas, P. Casale, B.C. Choudhury, A. Costa, P.H. Dutton, A. Fallabrino, E.M. Finkbeiner, A. Girard, M. Girondot, M. Hamann, B.J. Hurley, M. López-Mendilaharsu, M.A. Marcovaldi, J.A. Musick, R. Nel, N.J. Pilcher, S. Troëng, B. Witherington, and R.B. Mast. 2011. Global Conservation Priorities for Marine Turtles. *PLOS ONE* 6:e24510.
- Wang, T. 2011. Gas exchange in frogs and turtles: how ectothermic vertebrates contributed to solving the controversy of pulmonary oxygen secretion. *Acta Physiologica* 202:593-600.
- Wang, T., H.K. Egle, and J.W. Hicks. 1997. The Role of Cardiac Shunts in the Regulation of Arterial Blood Gases. *American Zoologist* 37:12-22.
- Wang, T., and J.W. Hicks. 1996a. Cardiorespiratory synchrony in turtles. *Journal of Experimental Biology* 199:1791-1800.
- Wang, T., and J.W. Hicks. 1996b. The interaction of pulmonary ventilation and the right-left shunt on arterial oxygen levels. *Journal of Experimental Biology* 199:2121-2129.
- Wang, T., S. Warburton, A. Abe, and T. Taylor. 2001. Vagal control of heart rate and cardiac shunts in reptiles: Relation to metabolic state. *Experimental Physiology* 86:777-784.
- Wasser, J.S., and D.C. Jackson. 1991. Effects of anoxia and graded acidosis on the levels of circulating catecholamines in turtles. *Respiration physiology* 84:363-377.
- West, J.B. 1962. Regional differences in gas exchange in the lung of erect man. *Journal of Applied Physiology* 17:893-898.
- West, N.H., P.J. Butler, and R.M. Bevan. 1992. Pulmonary Blood Flow at Rest and during Swimming in the Green Turtle, *Chelonia mydas*. *Physiological Zoology* 65:287-310.
- White, F.N., J.W. Hicks, and A. Ishimatsu. 1989. Respiratory states and intracardiac shunts in turtles. *American Journal of Physiology* 256:R240-R247.
- White, F.N., and G. Ross. 1966. Circulatory changes during experimental diving in the turtle. *American Journal of Physiology* 211:15-18.
- Wyneken, J. 2001. The anatomy of sea turtles In U.S. Department of Commerce, 172.
- Wyneken, J., K.J. Lohmann, and J.A. Musick. 2013. The Biology of Sea Turtles. CRC Press,

## Tables

**Table1: Morphometric data from loggerhead sea turtles used in the study.**

| Animal ID | CCL (cm) | CCW (cm) | Fishery  | $M_b$ (Kg) | Sex |
|-----------|----------|----------|----------|------------|-----|
| CC1       | 53       | 51       | Gillnet  | 19.2       | F   |
| CC2       | 36       | 32       | Gillnet  | 5.9        | F   |
| CC3       | 35       | 30       | Gillnet  | 4.8        | M   |
| CC4       | 27       | 24       | Stranded | 2.6        | F   |
| CC5       | 66       | 51       | Trawler  | 19.5       | F   |

Animal identification (Animal ID), curved carapace length (CCL), curved carapace width (CCW), type of fishery interaction (fishery), body mass ( $M_b$ ), and sex (M-male, F-female), of the five turtles that were opportunistically sampled.

**Table 2: Results from pharmacokinetic studies in loggerhead sea turtle selected tissues under different neurotransmitters.**

|      | 5HT                    |                        |       |
|------|------------------------|------------------------|-------|
|      | $E_{\max}$ (g)         | $-\log_{10}$<br>(EC50) | N(n)  |
| PEPA | 2.91±0.26 <sup>¶</sup> | 6.06±0.23              | 3(6)  |
| PASp | 8.15±1.45              | 5.91±0.48              | 2(6)  |
| IPA  | 3.12±0.56 <sup>¶</sup> | 5.73±0.41              | 2(6)  |
| SA   | NA                     | NA                     | NA    |
| LP   | 1.45±0.21 <sup>+</sup> | 5.73±0.52              | 4(6)  |
|      | ACh                    |                        |       |
|      | $E_{\max}$ (g)         | $-\log_{10}$<br>(EC50) | N(n)  |
| PEPA | 2.02±0.12 <sup>+</sup> | 4.76±0.14              | 2(4)  |
| PASp | 9.56±1.46              | 5.39±0.98              | 2(8)  |
| IPA  | 2.51±0.16 <sup>+</sup> | 6.28±0.20              | 2(6)  |
| SA   | 4.45±0.12 <sup>¶</sup> | 5.84±0.06              | 3(5)  |
| LP   | 4.53±0.55 <sup>¶</sup> | 5.38±0.48              | 2(6)  |
|      | Epi                    |                        |       |
|      | $E_{\max}$ (g)         | $-\log_{10}$<br>(EC50) | N(n)  |
| PEPA | -59±3%*                | 7.14±0.21 <sup>+</sup> | 2(3)  |
| PASp | -64±2%*                | 5.89±0.09 <sup>+</sup> | 4(10) |
| IPA  | 1.64±1.50              | 5.48±4.03              | 2(4)  |
| SA   | 6.17± 0.93             | 4.35±0.29              | 3(4)  |
| LP   | 1.34±0.40              | 7.79±1.47              | 2(13) |
|      | Hist                   |                        |       |

|      | $E_{\max}$ (g) | $-\log_{10}$<br>(EC50) | N(n) |
|------|----------------|------------------------|------|
| PEPA | NA             | NA                     | NA   |
| PASp | NA             | NA                     | NA   |
| IPA  | NA             | NA                     | NA   |
| SA   | NA             | NA                     | NA   |
| LP   | 1.38±0.15      | 6.31±0.32              | 4(5) |

Non-linear least squares regression showing the fitted values ( $\pm$  s.e.m) for the upper plateau ( $E_{\max}$ ), and the logarithm of the EC50 ( $\log_{10}(\text{EC50})$ ) contractile response of different tissues from loggerhead sea turtles during exposure to serotonin (5HT), acetylcholine (ACh), epinephrine (Epi), and Histamine (His): proximal segment of extrapulmonary artery (PEPA), pulmonary arterial sphincter (PASp), internal segment of pulmonary artery (IPA), lung parenchyma (LA), and systemic arteries (SA). The  $E_{\max}$  indicates the sensitivity, or the maximal contractile force (\*indicates the relative degree of relaxation as compared to papaverine), and  $-\log(\text{EC50})$  is the concentration for half of the maximal response. NA indicates no data available. All regressions were significant at  $P < 0.01$ . "N" is the number of animals and "n" the number of rings from the animals included. A t-test was used to compare the parameter response between PASp and the other vessels and tissues. For this comparison, \* $P < 0.05$ , ¶  $P < 0.1$ .

**Table 3: Results from pharmacokinetic studies in red-eared slider selected tissues under different neurotransmitters.**

|      | 5HT            |                       |      | ACh            |                       |       | Epi            |                        |      |
|------|----------------|-----------------------|------|----------------|-----------------------|-------|----------------|------------------------|------|
|      | $E_{\max}$ (g) | $\log_{10}$<br>(EC50) | N(n) | $E_{\max}$ (g) | $\log_{10}$<br>(EC50) | N(n)  | $E_{\max}$ (g) | $-\log_{10}$<br>(EC50) | N(n) |
| PEPA | 1.53±0.32      | 3.99±0.29             | 4(6) | 1.70±0.52      | 5.30±1.05             | 2(3)  | 1.19±0.07      | 6.78±0.19              | 3(5) |
| LP   | 2.48±0.17      | 4.15±0.12             | 4(8) | 4.32±0.76      | 3.44±0.52             | 6(11) | 2.19±0.17      | 5.73±0.37              | 3(3) |

Results from non-linear least squares regression showing the upper plateau ( $E_{\max}$ ), and the logarithm of the EC50 ( $\log(\text{EC50})$ ) contractile response of different tissues from red-eared slider turtle during exposure to serotonin (5HT), acetylcholine (ACh), and epinephrine (Epi): proximal segment of extrapulmonary artery (PEPA), and lung parenchyma (LP). The  $E_{\max}$  indicates the sensitivity, or the maximal contractile force (\*indicates the relative degree of relaxation), and  $-\log(\text{EC50})$  is the concentration for half of the maximal response. "N" is the number of animals and "n" the number of rings from the animals included.

## Figures

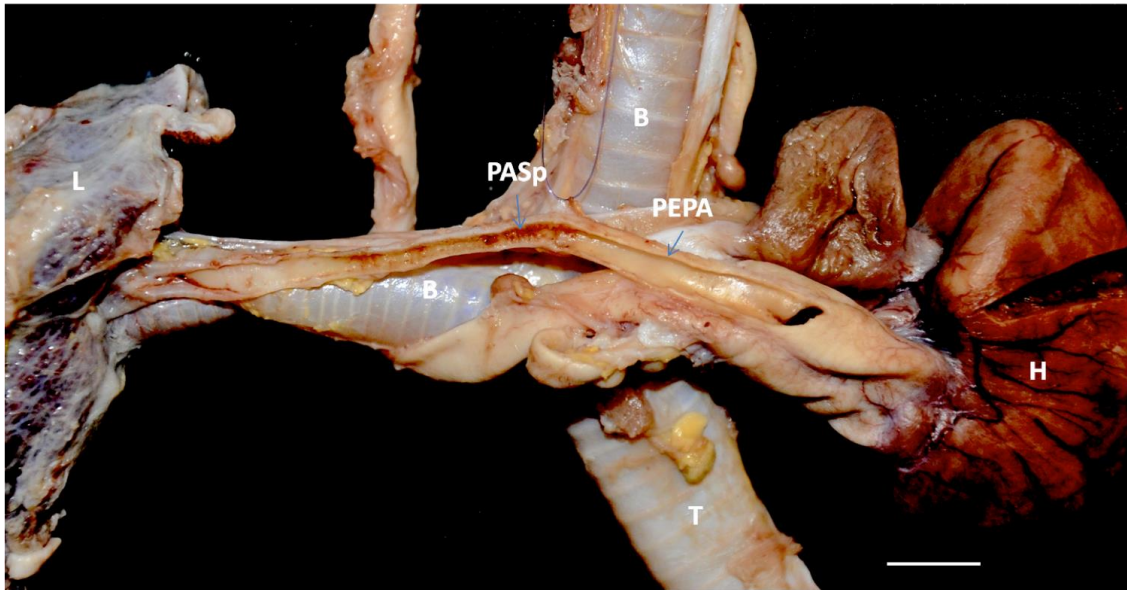

Figure.1: Gross anatomy of the cardiopulmonary vasculature and associated structures of a loggerhead turtle (*Caretta caretta*). H, heart; PEPA, proximal extrapulmonary artery; PASp, pulmonary arterial sphincter; L, Lung; T, trachea; B, main bronchus. Note the increased roughness of the intimal layer at the mid section of the pulmonary artery. 4% paraformaldehyde fixed tissues. Scale bar: 10mm.



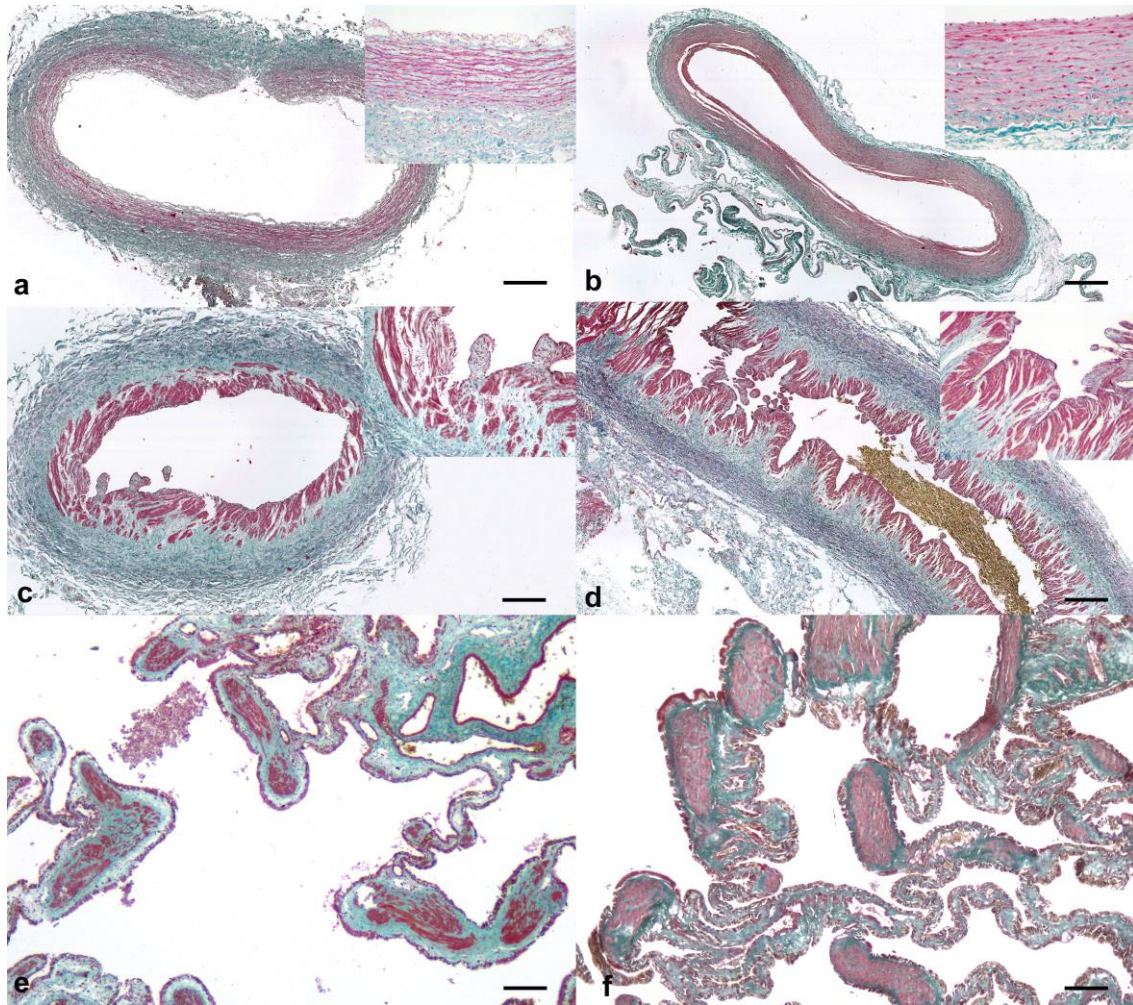

Figure. 2. Histological features of pulmonary artery, pulmonary sphincter and lung in loggerhead (*Caretta caretta*) and freshwater slider turtles (*Trachemys scripta elegans*), Masson's trichrome stain. PEPA in a loggerhead (Fig. 2a; scale bar: 550 $\mu$ m) and pulmonary artery in a freshwater slider (Fig. 2b; scale bar: 335 $\mu$ m) showing large lumen and a thin arterial wall composed of elastic fibers and collagen admixed with thin bundles of smooth muscle fibers (inserts: detail of the arterial walls). PASp of a loggerhead turtle in transverse (Fig. 2c; scale bar: 335 $\mu$ m) and longitudinal (Fig. 2d; scale bar: 435 $\mu$ m) sections. The tunica media shows thick bundles of smooth muscle arranged in accordion-like circumferential folds (inserts: detail of the muscular folds of the sphincter). Lung, from loggerhead (Fig. 2e; scale bar: 100 $\mu$ m), and freshwater slider (Fig. 2f; scale bar: 100 $\mu$ m) both revealing thick bundles of smooth muscle within the parenchyma.



5HT

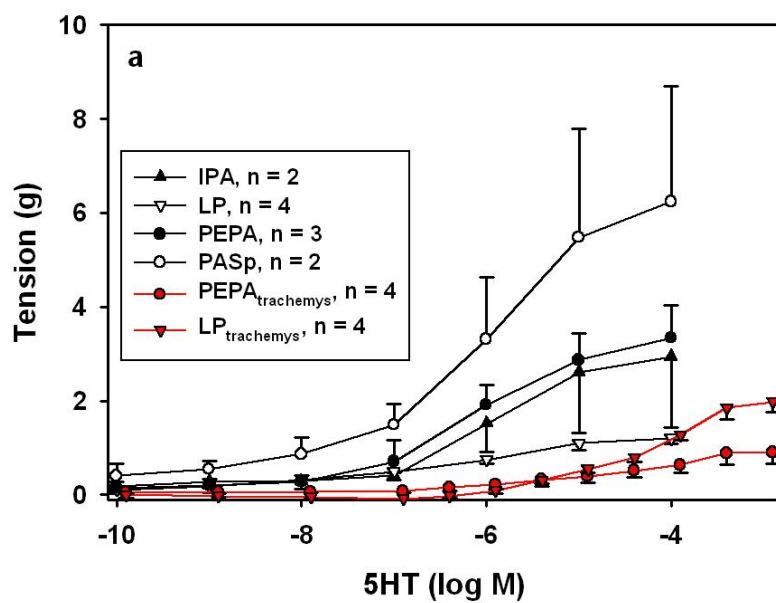

ACh

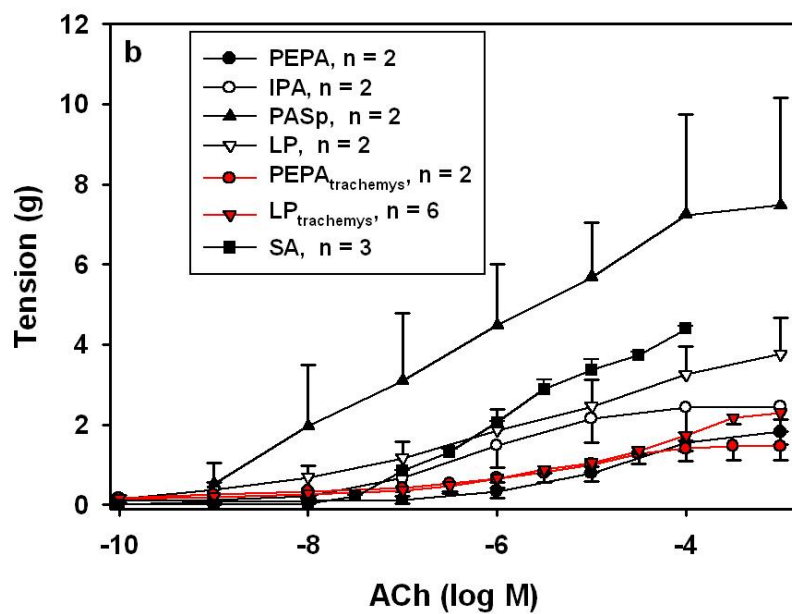

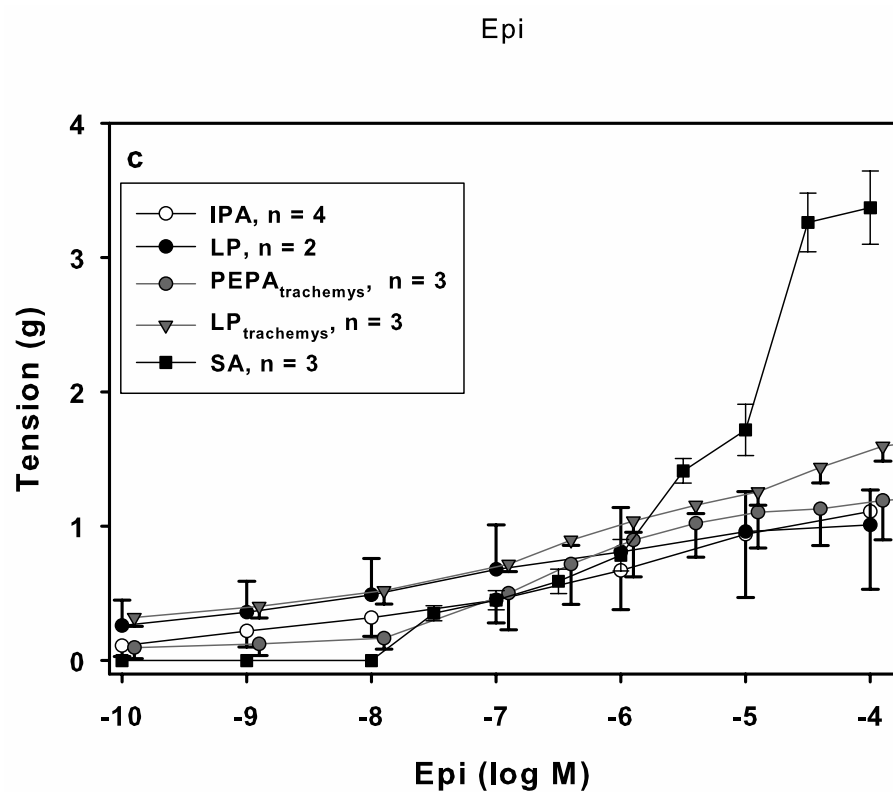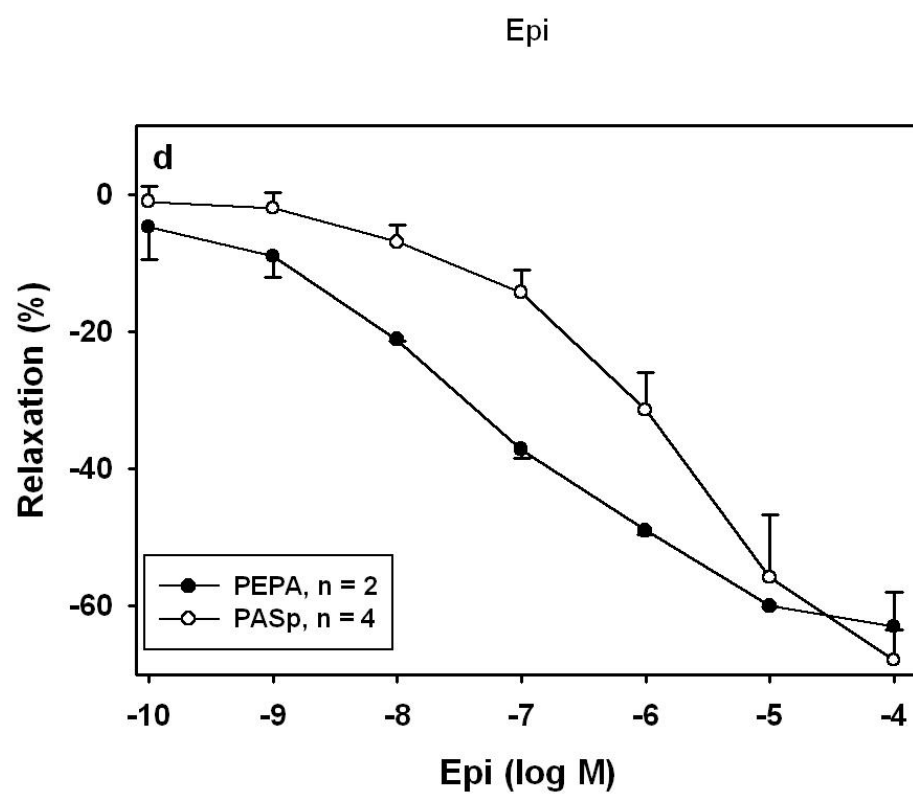

Figure 3. Mean ( $\pm$  s.e.m) vessel and tissue response (contraction or relaxation) of the extra-pulmonary artery (PEPA), pulmonary arterial sphincter (PASp), intrapulmonary artery (IPA), lung parenchyma (LP), and systemic artery (SA) in response to a) serotonin (5HT), b) acetylcholine (ACh), and c) and d) epinephrine (Epi) in loggerhead sea turtles (*Caretta caretta*). Tissues from freshwater sliders are identified in the legend as “Trachemys” while all others are sea turtle tissues. “n” indicates the number individual turtles on each group used for each regression. Contraction is expressed as mean ( $\pm$  s.e.m) contraction (g) against  $\log_{10}$ -transformed neurotransmitter concentration (log M). For relaxation, data are expressed as the relative decrease (%) as compared with relaxation with papaverine (0.3 mM).

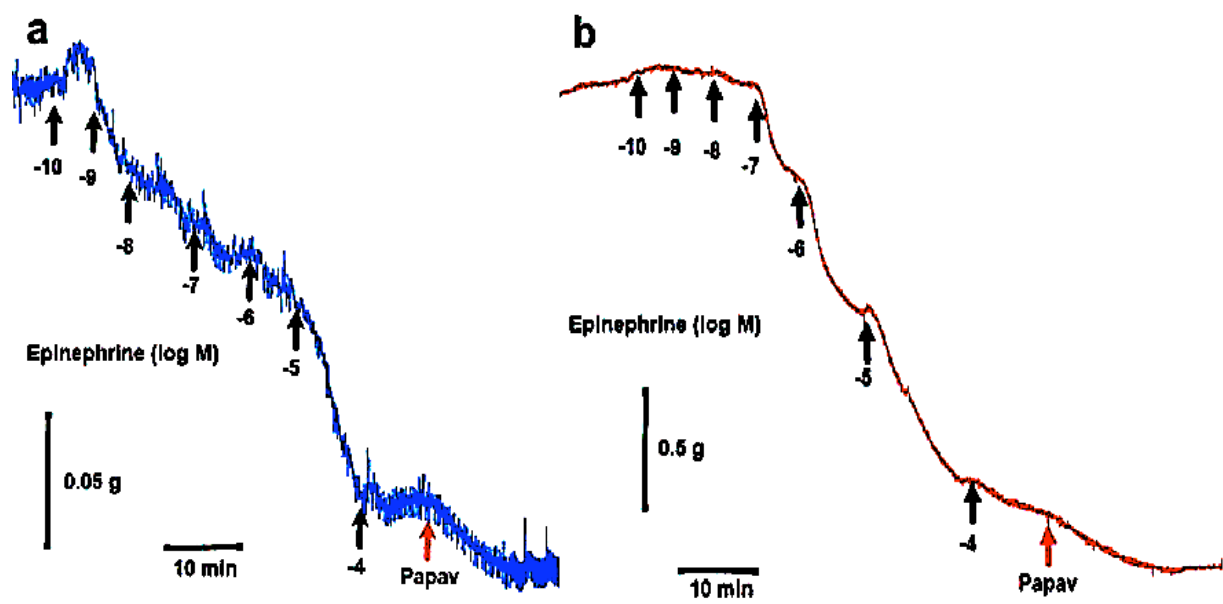

Figure 4. Representative data trace showing the effects of epinephrine on tension development in the a) extrapulmonary artery and the b) pulmonary artery sphincter. Inserts show the scale for time and tension.
